1 **Clinical Characteristics and Risk Factors for Myocardial Injury and**  
2 **Arrhythmia in COVID-19 patients**

3 Hong Gang Ren<sup>1,2</sup>, Xingyi Guo<sup>2</sup>, Lei Tu<sup>3</sup>, Qinyong Hu<sup>4</sup>, Kevin Blighe<sup>5</sup>, Luqman  
4 Bin Safdar<sup>6</sup>, Justin Stebbing<sup>7</sup>, Shepard D Weiner<sup>8</sup>, Monte S Willis<sup>9</sup>, Frits R  
5 Rosendaal<sup>10</sup>, Guogang Xu<sup>11</sup>, Feng Cao<sup>11</sup>, Dao Weng Wang<sup>12</sup>

6 <sup>1</sup>Department of Internal Medicine, Tongji Hospital, Tongji Medical College,  
7 Huazhong University of Science and Technology, Wuhan, China.

8 <sup>2</sup>Division of Epidemiology, Department of Medicine, Vanderbilt Epidemiology  
9 Center, Vanderbilt University School of Medicine, Nashville, TN, USA.

10 <sup>3</sup>Division of Gastroenterology, Union Hospital, Tongji Medical college,  
11 Huazhong University of Science and Technology, Wuhan, China.

12 <sup>4</sup>Cancer Center, Renmin Hospital of Wuhan University, Wuhan, China.

13 <sup>5</sup>Clinical Bioinformatics Research Ltd., London, UK.

14 <sup>6</sup>The Ministry of Agriculture and Rural Affairs, Wuhan 430062, China.

15 <sup>7</sup>Department of Surgery and Cancer, Division of Cancer, Imperial College  
16 London, Hammersmith Hospital Campus, Du Cane Road, London, UK.

17 <sup>8</sup>Division of Cardiology, Department of Medicine, Columbia University Medical  
18 Center, New York, NY, USA.

19 <sup>9</sup>Section of Cardiology, Department of Pathology and Laboratory Medicine,  
20 Indiana University School of Medicine, Indianapolis, Indiana, USA.

21 <sup>10</sup>Department of Clinical Epidemiology and Department of Thrombosis and  
22 Haemostasis, Leiden University Medical Center, Leiden, The Netherlands.

23 <sup>11</sup>The Second Medical Center & National Clinical Research Center for Geriatric  
24 Diseases, Chinese PLA General Hospital, Beijing, China.

25 <sup>12</sup>Cardiovascular Department, Tongji Medical College, Huazhong University of  
26 Science and Technology, Wuhan, China.

27 **Corresponding Authors:**

28 **Prof. Feng Cao**, E-mail address: [fengcao8828@163.com](mailto:fengcao8828@163.com)

29 **Prof. Dao Weng Wang**, E-mail address: [daowen.wang@foxmail.com](mailto:daowen.wang@foxmail.com)

30 **Disclosure:** the authors have nothing to disclose.

WITHDRAWN  
see manuscript DOI for details

31 **ABSTRACT**

32 **Background:** Patients with COVID-19 can develop myocardial injury and  
33 arrhythmia during the course of their illness. However, the underlying risk  
34 factors for the development of cardiovascular related manifestations are  
35 unclear.

36 **Methods:** Using a register-based multi-center cross-sectional design, we  
37 analyzed 80 patients with myocardial injury and 401 controls, as well as 71  
38 patients with arrhythmia and 409 controls, all admitted with COVID-19.  
39 Putative risk factors for myocardial injury and arrhythmia were evaluated with  
40 logistic regression with adjustment for potential confounders.

41 **Results:** COVID-19 patients with myocardial injury had fatigue (66.2%) and  
42 dyspnea (63.7%), while those with arrhythmia had dyspnea (71.8%). Patients  
43 with myocardial injury and arrhythmia had a significant mortality of 92.5% and  
44 94.4%, respectively. A history of chronic obstructive pulmonary disease (COPD)  
45 or heart diseases was associated with an increased risk of myocardial injury  
46 (odds ratio [OR] = 1.94, 95% confidence interval [CI]: 1.01-3.71; OR = 7.43, 95%  
47 CI: 3.99-13.83) and arrhythmia (OR = 1.94, 95% CI: 1.00-3.75; OR = 13.16, 95%  
48 CI: 6.75-25.68). In addition, we found that gamma glutamyltranspeptidase  
49 (GGT) >50U/L (OR = 2.14, 95% CI: 1.37-3.32; OR = 1.85, 95% CI: 1.19-2.85),  
50 serum creatinine >111 $\mu$ mol/L (OR = 8.96, 95% CI: 4.4-18.23; OR = 3.71, 95%  
51 CI: 2.01-6.85), serum sodium <136 mmol/L (OR = 4.68, 95% CI: 2.46-8.91; OR  
52 = 2.06; 95% CI: 1.06-4.00) were all associated with increased risk of  
53 myocardial injury and arrhythmia, respectively.

54 **Conclusion:** Our reported clinical characteristics and identified risk factors are  
55 important for clinical study of COVID-19 patients developing myocardial injury  
56 and arrhythmia.

57

## 58 INTRODUCTION

59 The outbreak of new coronavirus disease (COVID-19) was characterized as a  
60 pandemic by World Health Organization on March 11, 2020<sup>1,2</sup>. COVID-19 may  
61 cause pneumonia with severe respiratory symptoms that may progress to  
62 acute respiratory distress syndrome (ARDS) and even death. Common signs  
63 of COVID-19 are fever, cough, muscle soreness, weakness, breathing difficulty  
64 and dyspnea<sup>3</sup>. During an infection, COVID-19 patients may develop varying  
65 degrees of myocardial injury<sup>3-6</sup>. In a previous study by Huang *et al.*<sup>1</sup>, 5 out of  
66 41 study participants were diagnosed with acute myocardial injury. The main  
67 manifestations of acute myocardial injury have been hypersensitive cardiac  
68 aggregates, troponin I (hs-cTnI) and elevated blood pressure. Most patients  
69 with significant myocardial injury required treatment in the Intensive Care Unit  
70 (ICU)<sup>3-6</sup>. Other studies have shown that plasma biomarkers of myocardial  
71 injury, including creatine kinase (CK-MB), and troponin I were higher in ICU  
72 patients than those not treated in the ICU, providing evidence that ICU patients  
73 are more likely to develop cardiac complications such as myocardial injury<sup>3</sup>.

74 It has been suggested that systemic inflammatory responses and immune  
75 system disorders lead to increased rates of cardiovascular symptoms<sup>1, 7-9</sup>.  
76 SARS-CoV-2 causes a severe inflammatory response, which may play a role  
77 in the development of myocardial infarction and arrhythmias. In a retrospective  
78 study of 138 hospitalized COVID-19 patients by Wang *et al*, nearly 17% of  
79 patients developed arrhythmia and 7.2% experienced acute cardiac injury<sup>3</sup>.

80 The clinical presentation of COVID-19 patients with myocardial injury or  
81 arrhythmias is different in many ways from patients without cardiac  
82 involvement. Fatigue, anorexia, dyspnea, vomit and diarrhea are were more  
83 commonly observed for COVID-19 patients with myocardial injury or  
84 arrhythmias than the latter patients. To date, there has not been any clinical  
85 research investigating the risk factors related to myocardial injury and

86 arrhythmia in patients with COVID-19. Furthermore, there are no studies which  
87 explore whether or not the development of myocardial injury and arrhythmia  
88 influences the prognosis of COVID-19 patients, although intuitively, one would  
89 expect patients with cardiac manifestations to have a worse prognosis. Here,  
90 we have recruited 481 COVID-19 patients used a registry-based multi-center  
91 cross-sectional design from a retrospective study. We evaluated clinical  
92 characteristics of 80 patients with myocardial injury and 71 patients with  
93 arrhythmias. We further evaluated the associations of potential risk factors with  
94 myocardial injury and arrhythmia caused by COVID-19.

## 95 **METHODS**

### 96 **Study design and data collection**

97 This was a retrospective cross-sectional study of medical records from three  
98 medical centers in Hubei province. Oral informed consent was obtained from  
99 all subjects, and the institutional review boards of all participating institutions  
100 approved the study protocol. We recruited 481 admitted COVID-19 patients  
101 from Wuhan Union West Hospital (n=265), Wuhan Hannan General Hospital  
102 (n=153) and Enshi General Hospital (n=63) from January 8<sup>th</sup>, 2020 to April 20<sup>th</sup>,  
103 2020. The end-of-study date was April 24<sup>th</sup>, 2020. We reviewed nursing charts,  
104 clinical records, laboratory findings, and imaging results for patients with a  
105 COVID-19 diagnosis in the three hospital systems based on the National  
106 Health Commission and CDC, China protocol (the 5th edition). These data  
107 have not yet been published.

### 108 **Study outcomes**

109 Acute myocardial injury was defined by serum levels of troponin T (TnT) at the  
110 99th percentile or greater, as previously described<sup>1</sup>. Malignant arrhythmia was  
111 defined as rapid ventricular tachycardia lasting more than 30 seconds,  
112 inducing hemodynamic instability and/or ventricular fibrillation, as per the

113 American College of Cardiology/American Heart Association Task Force on  
114 Clinical Data Standards (ACC/AHA/HRS). Health services utilization patterns  
115 were analyzed as binary variables (yes or no) to ventilation, antibiotics,  
116 antifungals, antiviral agents and hemodialysis.

117 The following demographic and clinical features were identified from patients'  
118 medical records: socio-demographic variables included sex (male and female),  
119 race (Han, others), age (continuous variable), and smoking. Disease severities  
120 included the number of symptoms, unilateral or bilateral infection, and imaging  
121 characteristics (ground-glass opacification/opacity, yes/no). Comorbidity  
122 variables included cardiovascular diseases such as hypertension, underlying  
123 heart disease and coronary artery disease, chronic kidney and/or liver disease,  
124 chronic obstructive airways disease (COPD), diabetes and others. Laboratory  
125 tests analyzed included complete blood count, comprehensive metabolic panel  
126 (CMP) and clotting factors.

## 127 **Statistical Analysis**

128 Kruskal-Wallis tests were applied for continuous variables among patients  
129 from the three different regions. Categorical variables were displayed as  
130 counts or percentages. Chi-square tests were applied for categorical variables  
131 among patients from different regions. The associations of risk factors with  
132 myocardial injury and arrhythmia were evaluated using logistic regression  
133 models with an adjustment of potential confounders including after adjusting  
134 for age, gender, smoking status, and disease history. Continuous variables  
135 were summarized as medians. All statistical analyses were implemented using  
136 SAS, version 9.4 (SAS Institute, Inc.). A *P* value <0.05 for a two-tailed test was  
137 considered statistically significant.

## 138 **RESULTS**

### 139 **Clinic characteristics of study participants with myocardial injury**

140 Socio-demographic and clinical characteristics of the 481 study participants  
141 including 80 cases of myocardial injury and 401 controls, were shown in Table  
142 1. The median age (SD) of the study participants was 56. Of the patients with  
143 myocardial injury, 66.2% had fatigue and 63.7% had dyspnea. Disease  
144 severity was more likely to be higher in patients with myocardial injury (2.5%  
145 were mild, 2.5% were moderate and 95% were severe,  $P < 0.001$ ). In contrast,  
146 2/3 of the control subjects had mild disease. Of the patients with myocardial  
147 injury, 7.5% recovered and were discharged from hospital, while 92.5% died  
148 ( $P < 0.001$ ).

149 We observed that age was associated with an increased risk of myocardial  
150 injury case ( $P < 0.01$ ; Table 1). We also observed that there was a male  
151 predominance for myocardial injury (70% vs 30%,  $P = 0.003$ ; Table 1). There  
152 was no such male predominance in the control group. No significant  
153 associations with myocardial injury were observed for smoking status and  
154 maximum temperature during fever.

### 155 **Multivariate analysis between laboratory parameters and myocardial** 156 **injury**

157 Patients with an abnormal GGT were associated with an increased risk of  
158 developing myocardial injury (OR = 2.14, 95% CI: 1.37-3.32; Table 2).  
159 Elevated serum creatinine (adjusted OR = 8.96, 95% CI: 4.4-18.23) and  
160 reduced serum sodium (adjusted OR = 4.68, 95% CI: 2.46-8.91) were also  
161 associated with an increased risk of myocardial injury. However, white blood  
162 cell count, lymphocyte count, total bilirubin, alanine aminotransferase,  
163 aspartate aminotransferase (AST) and blood urea nitrogen (BUN) did not  
164 appear to be associated with the risk of myocardial injury. In addition to these  
165 laboratory parameters, we observed that the uses of antibiotics (adjusted OR =  
166 3.07, 95% CI: 1.58-5.95) and antiviral therapy (OR = 2.18, 95% CI: 1.2-3.93)  
167 were associated with an increased risk of myocardial injury. However, AST,

168 albumin, BUN did not appear to be associated with the risk of malignant  
169 arrhythmia caused by COVID-19.

### 170 **Clinic characteristics of study participants with arrhythmias**

171 Socio-demographic and clinical characteristics of 71 cases of arrhythmia and  
172 409 controls, were analyzed (Table 1). Patients with arrhythmia (Median  
173 age=61) had significantly older than controls (Median age=56) – 66.2% of  
174 cases were male. No significant differences were found for smoking status and  
175 highest fever between cases and controls.

176 Of the 71 arrhythmia cases, 71.8% had dyspnea – 95.8% participants with  
177 arrhythmia were classified as having severe COVID-19 disease. The outcome  
178 of patients with arrhythmia was poor, with only 5.6% recovering and being  
179 discharges and 94.4% dead ( $P<0.001$ ).

### 180 **Multivariate analysis of laboratory parameters with arrhythmias**

181 Table 2 illustrates the association between different laboratory parameters and  
182 arrhythmias. Patients with increased GGT had a 1.85-fold increase in risk of  
183 arrhythmias when compared with those with normal GGT (95% CI:1.19-2.85).  
184 In addition, the elevated serum sodium was associated with increased risk of  
185 arrhythmia (adjusted OR = 2.06, 95% CI:1.06-4.00). In addition to these  
186 laboratory parameters, we observed that the uses of oxygen therapy (adjusted  
187 OR = 3.11, 95%CI: 1.65-5.83) and antibiotic therapy (OR = 2.03, 95% CI:  
188 1.1-3.76) were associated with an increased risk of arrhythmia. However, AST,  
189 albumin, and BUN did not appear to be associated with the risk of arrhythmia  
190 caused by COVID-19 as well.

### 191 **DISCUSSION**

192 In a large study of Covid-19 patients with and without myocardial injury and  
193 arrhythmia we found that older age, male sex, history of COPD and heart  
194 diseases, electrolyte disturbance and renal dysfunction were associated .With

195 the exception of asymptomatic carriers, most COVID-19 patients may develop  
196 pneumonia with severe respiratory symptoms<sup>1, 10</sup>. The more severe cases  
197 progress to multiple organ failure or even death.

198 It is believed that a cytokine release syndrome or cytokine storm which is  
199 triggered by the host response to the virus is responsible for acute injury to  
200 multiple organ systems including the heart, liver, and kidneys. It is becoming  
201 apparent that cardiovascular disease resulting from COVID-19 is not as  
202 uncommon as previously thought, and that the involvement of the heart prone  
203 to more severe disease and increased mortality. Thus, the identification of risk  
204 factors for arrhythmias and acute myocardial injury is important for  
205 prognostication, in addition to early intervention, early diagnosis and treatment,  
206 which may help reduce morbidity and mortality.

207 A previous study showed that 53.3% of COVID-19 patients with heart damage  
208 were men. In that study, myocardial injury was negatively correlated with age  
209 and the incidence of myocardial injury was lowest over the age of eighty. In our  
210 study, indicators of cardiac injury were generally negative in the patients with  
211 mild and moderate disease. AST, LDH, CTN I and MYO showed a strong  
212 correlation with myocardial injury. This is consistent with the results of Zhong *et*  
213 *al.*<sup>11</sup>. We also found that patients who were not treated with glucocorticoids  
214 (GCs) and immunoglobulin therapy appeared to be at higher risk for heart  
215 damage. The protective role of GCs may be related to their  
216 immunosuppressive effects on leukocytes and endothelial cells to reduce the  
217 generation and release of pro-inflammatory cytokines that  
218 target cardiomyocytes<sup>12</sup>. The glucocorticoid receptor (GR) is expressed  
219 abundantly in cardiomyocytes, and the variability of acute cardiac injury may  
220 be related to polymorphisms of the glucocorticoid receptor. In addition, the GR  
221 can be selectively activated and cyclooxygenase (COX)-2 and prostaglandin  
222 (PG) biosynthesis in cardiomyocytes can be induced, which may help mediate  
223 cardioprotection<sup>13, 14</sup>. Biosynthesis of prostaglandin can inhibit COX-2, and,

224 therefore, relieve inflammation derived myocardial damage in COVID-19  
225 patients.

226 We found that white blood cell numbers, lymphocyte numbers, neutrophil  
227 numbers, albumin, total bilirubin, alanine aminotransferase, AST, serum  
228 sodium, BUN, serum creatinine, GGT and myoglobin were positively  
229 correlated with myocardial injury. Elevated neutrophil counts led to a 3.35-fold  
230 increase in acute cardiac injury. Neutrophils are often the first type of leukocyte  
231 that infiltrate the heart in times of hyperimmune status. Their activation  
232 produces large amounts of inflammatory mediators, which mediate injury to  
233 the heart through the action of reactive oxygen species and proteolytic  
234 enzymes, leading to reduced oxygenation of the heart tissue<sup>15-17</sup>. Neutrophils  
235 can also induce migration of They are also involved in macrophage migration  
236 to the infarct site in order to clear debris. The inflammatory process induced by  
237 neutrophils involves a process known as netosis through the generation of  
238 neutrophil extracellular traps (NETs).

239 We observed a negative correlation between albumin levels and risk of  
240 myocardial injury. This relationship has never been reported<sup>18</sup>. Serum albumin  
241 (SA) may exert a cardio-protective effect by functioning as a natural inhibitor of  
242 the angiotensin-converting enzyme (ACE). ACE activity has also been  
243 associated with coronary vascular resistance in recent animal studies. The  
244 cardio-protective effect of ACE inhibition in cardiac surgery has been  
245 previously demonstrated<sup>19-23</sup>. Within the physiological range of SA  
246 concentrations (35-52 mg/ml), almost all ACE is bound to albumin (and thus  
247 inactive). Below the physiological range of SA concentrations there is a rapid  
248 increase in the fraction of unbound (and thus active) ACE. The drop in SA in  
249 patients with heart damage is an important observation with potential  
250 therapeutic implications, including the close monitoring of albumin in patients  
251 admitted for COVID-19 pneumonia. Myoglobin, a useful marker of cardiac  
252 damage, has also been positively associated with a risk of heart damage<sup>24</sup>.

253 In our study, the arrhythmia group had a higher number of elderly subjects  
254 (except for age >80), whereas in the control group, there was an equal  
255 distribution in the <40, 40-60- and 60-80-year age categories. AST, LDH, CTN  
256 I and MYO also showed a strong correlation with arrhythmia. Patients who  
257 were not treated with glucocorticoids (GCs) and immunotherapy had a higher  
258 incidence of arrhythmias, in concert with the observations in myocardial injury,  
259 most likely through the same anti-inflammatory mechanism.

## 260 **LIMITATIONS**

261 One important limitation of our study is that it does not fully elaborate on  
262 whether patients were admitted to hospital with cardiac disease already, which  
263 could mean that we would be studying the consequences of cardiac disease  
264 rather than risk factors for cardiac disease. Although, we do attempt to  
265 elucidate this via each respective patient's medical history. In our study, timing  
266 is also crucial: our study is not strictly a cross-sectional study where variables  
267 present at the same time were observed - this study is about patients who all  
268 had COVID-19, and some also had heart disease around that time. It is  
269 important to know whether heart disease began before or after admission for  
270 COVID-19.

## 271 **CONCLUSION**

272 In conclusion, our study produced valuable clinical data related to the study of  
273 myocardial injury and arrhythmias in COVID-19 patients. We identified several  
274 risk factors associated with myocardial injury and arrhythmias in COVID-19  
275 patients. Our findings provide potential markers for the further development of  
276 clinical guidance and treatment for COVID-19 patients with a considerable risk  
277 of developing severe cardiac manifestations.

278 **Declaration of interests:** All authors declare no competing interests.

279 **Acknowledgments:** We thank all the patients and their families, and the

280 clinical staff who treated the patients in Hannan, Enshi and Union medical  
281 centres. We would also like to thank Troy Gharibani at University of Maryland,  
282 USA for editing and providing feedback on this article.  
283

WITHDRAWN  
see manuscript DOI for details

284 **References**

- 285 1. Huang C, Wang Y, Li X, Ren L, Zhao J, Hu Y, Zhang L, Fan G, Xu J, Gu X,  
286 Cheng Z, Yu T, Xia J, Wei Y, Wu W, Xie X, Yin W, Li H, Liu M, Xiao Y, Gao H,  
287 Guo L, Xie J, Wang G, Jiang R, Gao Z, Jin Q, Wang J, Cao B. Clinical features  
288 of patients infected with 2019 novel coronavirus in Wuhan, China. *Lancet*  
289 2020;**395**(10223):497-506.
- 290 2. Zhu N, Zhang D, Wang W, Li X, Yang B, Song J, Zhao X, Huang B, Shi W,  
291 Lu R, Niu P, Zhan F, Ma X, Wang D, Xu W, Wu G, Gao GF, Tan W, China Novel  
292 Coronavirus Investigating and Research Team. A Novel Coronavirus from  
293 Patients with Pneumonia in China, 2019. *The New England journal of medicine*  
294 2020;**382**(8):727-733.
- 295 3. Wang D, Hu B, Hu C, Zhu F, Liu X, Zhang J, Wang B, Xiang H, Cheng Z,  
296 Xiong Y, Zhao Y, Li Y, Wang X, Peng Z. Clinical Characteristics of 138  
297 Hospitalized Patients With 2019 Novel Coronavirus-Infected Pneumonia in  
298 Wuhan, China. *JAMA* 2020.
- 299 4. Zhou F, Yu T, Du R, Fan G, Liu Y, Liu Z, Xiang J, Wang Y, Song B, Gu X,  
300 Guan L, Wei Y, Li H, Wu X, Xu J, Tu S, Zhang Y, Chen H, Cao B. Clinical  
301 course and risk factors for mortality of adult inpatients with COVID-19 in  
302 Wuhan, China: a retrospective cohort study. *Lancet*  
303 2020;**395**(10229):1054-1062.
- 304 5. Shi S, Qin M, Shen B, Cai Y, Liu T, Yang F, Gong W, Liu X, Liang J, Zhao Q,  
305 Huang H, Yang B, Huang C. Association of Cardiac Injury With Mortality in  
306 Hospitalized Patients With COVID-19 in Wuhan, China. *JAMA cardiology*  
307 2020.
- 308 6. Guo T, Fan Y, Chen M, Wu X, Zhang L, He T, Wang H, Wan J, Wang X, Lu  
309 Z. Cardiovascular Implications of Fatal Outcomes of Patients With Coronavirus  
310 Disease 2019 (COVID-19). *JAMA cardiology* 2020.

- 311 7. Corrales-Medina VF, Musher DM, Wells GA, Chirinos JA, Chen L, Fine MJ.  
312 Cardiac complications in patients with community-acquired pneumonia:  
313 incidence, timing, risk factors, and association with short-term mortality.  
314 *Circulation* 2012;**125**(6):773-81.
- 315 8. Xu Z, Shi L, Wang Y, Zhang J, Huang L, Zhang C, Liu S, Zhao P, Liu H,  
316 Zhu L, Tai Y, Bai C, Gao T, Song J, Xia P, Dong J, Zhao J, Wang FS.  
317 Pathological findings of COVID-19 associated with acute respiratory distress  
318 syndrome. *The Lancet. Respiratory medicine* 2020;**8**(4):420-422.
- 319 9. Smeeth L, Thomas SL, Hall AJ, Hubbard R, Farrington P, Vallance P. Risk  
320 of myocardial infarction and stroke after acute infection or vaccination. *The*  
321 *New England journal of medicine* 2004;**351**(25):2611-8.
- 322 10. Chen N, Zhou M, Dong X, Qu J, Gong F, Han Y, Qiu Y, Wang J, Liu Y, Wei  
323 Y, Xia J, Yu T, Zhang X, Zhang L. Epidemiological and clinical characteristics of  
324 99 cases of 2019 novel coronavirus pneumonia in Wuhan, China: a descriptive  
325 study. *Lancet* 2020;**395**(10223):507-513.
- 326 11. Guan WJ, Zhong NS. Clinical Characteristics of Covid-19 in China. Reply.  
327 *The New England journal of medicine* 2020;**382**.
- 328 12. Tokudome S, Sano M, Shinmura K, Matsuhashi T, Morizane S, Moriyama  
329 H, Tamaki K, Hayashida K, Nakanishi H, Yoshikawa N, Shimizu N, Endo J,  
330 Katayama T, Murata M, Yuasa S, Kaneda R, Tomita K, Eguchi N, Urade Y,  
331 Asano K, Utsunomiya Y, Suzuki T, Taguchi R, Tanaka H, Fukuda K.  
332 Glucocorticoid protects rodent hearts from ischemia/reperfusion injury by  
333 activating lipocalin-type prostaglandin D synthase-derived PGD2 biosynthesis.  
334 *The Journal of clinical investigation* 2009;**119**(6):1477-88.
- 335 13. Dowd NP, Scully M, Adderley SR, Cunningham AJ, Fitzgerald DJ.  
336 Inhibition of cyclooxygenase-2 aggravates doxorubicin-mediated cardiac injury  
337 in vivo. *The Journal of clinical investigation* 2001;**108**(4):585-90.

- 338 14. Takahashi T, Zhu SJ, Sumino H, Saegusa S, Nakahashi T, Iwai K,  
339 Morimoto S, Kanda T. Inhibition of cyclooxygenase-2 enhances myocardial  
340 damage in a mouse model of viral myocarditis. *Life sciences*  
341 2005;**78**(2):195-204.
- 342 15. Ong SB, Hernández-Reséndiz S, Crespo-Avilan GE, Mukhametshina RT,  
343 Kwek XY, Cabrera-Fuentes HA, Hausenloy DJ. Inflammation following acute  
344 myocardial infarction: Multiple players, dynamic roles, and novel therapeutic  
345 opportunities. *Pharmacology & therapeutics* 2018;**186**:73-87.
- 346 16. Karakas MS, Korucuk N, Tosun V, Altekin RE, Koç F, Ozbek SC, Ozel D,  
347 Ermis C. Red cell distribution width and neutrophil-to-lymphocyte ratio predict  
348 left ventricular dysfunction in acute anterior ST-segment elevation myocardial  
349 infarction. *Journal of the Saudi Heart Association* 2016;**28**(3):152-8.
- 350 17. Williams BA, Merhige ME. Association between neutrophil-lymphocyte  
351 ratio and impaired myocardial perfusion in patients with known or suspected  
352 coronary disease. *Heart & lung : the journal of critical care* 2013;**42**(6):436-41.
- 353 18. van Beek D, van der Horst I, de Geus AF, Mariani MA, Scheeren T.  
354 Albumin, a marker for post-operative myocardial damage in cardiac surgery.  
355 *Journal of critical care* 2018;**47**:55-60.
- 356 19. Fagyas M, Úri K, Siket IM, Fülöp GÁ, Csató V, Daragó A, Boczán J, Bányai  
357 E, Szentkirályi IE, Maros TM, Szerafin T, Édes I, Papp Z, Tóth A. New  
358 perspectives in the renin-angiotensin-aldosterone system (RAAS) II: albumin  
359 suppresses angiotensin converting enzyme (ACE) activity in human. *PLoS one*  
360 2014;**9**(4):e87844.
- 361 20. Garg R, Yusuf S. Overview of randomized trials of angiotensin-converting  
362 enzyme inhibitors on mortality and morbidity in patients with heart failure.  
363 Collaborative Group on ACE Inhibitor Trials. *JAMA* 1995;**273**(18):1450-6.
- 364 21. Dagenais GR, Pogue J, Fox K, Simoons ML, Yusuf S.

- 365 Angiotensin-converting-enzyme inhibitors in stable vascular disease without  
366 left ventricular systolic dysfunction or heart failure: a combined analysis of  
367 three trials. *Lancet* 2006;**368**(9535):581-8.
- 368 22. Lazar HL, Volpe C, Bao Y, Rivers S, Vita JA, Keaney JF Jr. Beneficial  
369 effects of angiotensin-converting enzyme inhibitors during acute  
370 revascularization. *The Annals of thoracic surgery* 1998;**66**(2):487-92.
- 371 23. Lazar HL, Bao Y, Rivers S, Bernard SA. Pretreatment with  
372 angiotensin-converting enzyme inhibitors attenuates ischemia-reperfusion  
373 injury. *The Annals of thoracic surgery* 2002;**73**(5):1522-7.
- 374 24. Furuhashi M, Ura N, Hasegawa K, Yoshida H, Tsuchihashi K, Nakata T,  
375 Shimamoto K. Serum ratio of heart-type fatty acid-binding protein to myoglobin.  
376 A novel marker of cardiac damage and volume overload in hemodialysis  
377 patients. *Nephron. Clinical practice* 2003;**93**(2):C69-74.

378

**Table 1. Clinic Characteristics of Study Participants on Myocardial Injury and Arrhythmia**

| Characteristic                            | Myocardial Injury |                 | Arrhythmia      |                 |
|-------------------------------------------|-------------------|-----------------|-----------------|-----------------|
|                                           | Yes               | No              | Yes             | No              |
| <b>Number (%)</b>                         | 80                | 401             | 71              | 410             |
| <b>Age (years)</b>                        |                   |                 |                 |                 |
| ≤40                                       | 3 (3.8)           | 110 (27.4)      | 2 (2.8)         | 111 (27.1)      |
| 40-59                                     | 12 (15.0)         | 148 (36.9)      | 15 (21.1)       | 145 (35.4)      |
| 60-79                                     | 52 (65.0)         | 128 (31.9)      | 44 (62.0)       | 136 (33.2)      |
| ≥80                                       | 13 (16.2)         | 15 (3.7)        | 10 (14.1)       | 18 (4.4)        |
| <b>Sex</b>                                |                   |                 |                 |                 |
| Female                                    | 24 (30.0)         | 196 (48.9)      | 24 (33.8)       | 196 (47.8)      |
| Male                                      | 56 (70.0)         | 205 (51.1)      | 47 (66.2)       | 214 (52.2)      |
| <b>Smoking status</b>                     |                   |                 |                 |                 |
| Never                                     | 69 (86.2)         | 372 (92.8)      | 64 (90.1)       | 377 (92.0)      |
| Current                                   | 10 (12.5)         | 27 (6.7)        | 6 (8.5)         | 31 (7.6)        |
| Former                                    | 1 (1.2)           | 2 (0.5)         | 1 (1.4)         | 2 (0.5)         |
| <b>The highest temperature (Mean, SD)</b> | 38.36<br>(1.01)   | 38.05<br>(1.75) | 38.36<br>(1.05) | 38.06<br>(1.73) |
| <b>Signs and symptoms</b>                 |                   |                 |                 |                 |
| Fatigue                                   | 53 (66.2)         | 191 (47.6)      | 39 (54.9)       | 205 (50.0)      |
| Anorexia                                  | 51 (63.7)         | 264 (65.8)      | 40 (56.3)       | 275 (67.1)      |
| Dyspnea                                   | 51 (63.7)         | 60 (15.0)       | 51 (71.8)       | 60 (14.6)       |
| <b>Disease severity</b>                   |                   |                 |                 |                 |
| Mild                                      | 2 (2.5)           | 270 (67.3)      | 3 (4.2)         | 269 (65.6)      |
| General                                   | 2 (2.5)           | 48 (12.0)       | 0 (0.0)         | 50 (12.2)       |
| Serious                                   | 76 (95.0)         | 83 (20.7)       | 68 (95.8)       | 91 (22.2)       |
| <b>Outcomes</b>                           |                   |                 |                 |                 |
| Death                                     | 74 (92.5)         | 73 (18.2)       | 67 (94.4)       | 80 (19.5)       |

|                   |         |            |         |            |
|-------------------|---------|------------|---------|------------|
| Discharge         | 6 (7.5) | 312 (77.8) | 4 (5.6) | 314 (76.6) |
| Still in hospital | 0 (0.0) | 16 (4.0)   | 0 (0.0) | 16 (3.9)   |

---

380

WITHDRAWN  
see manuscript DOI for details

**Table 2 Multi-variable Analysis of putative risk factors for Myocardial Injury and Arrhythmia**

| Characteristic           | Myocardial Injury |            | OR                 | Adjusted. OR       | Arrhythmia |            | OR                  | Adjusted. OR       |
|--------------------------|-------------------|------------|--------------------|--------------------|------------|------------|---------------------|--------------------|
|                          | Yes               | No         | (95% CI)           | (95% CI)           | Yes        | No         | (95% CI)            | (95% CI)           |
|                          | n=80              | n=401      |                    |                    | n=71       | n=410      |                     |                    |
| <b>Age (years)</b>       |                   |            |                    |                    |            |            |                     |                    |
| ≤40                      | 3 (3.8)           | 110 (27.4) |                    |                    | 2 (2.8)    | 111 (27.1) |                     |                    |
| 40-59                    | 12 (15.0)         | 148 (36.9) | 2.97(0.82, 10.79)  | 2.07(0.55, 7.74)   | 15 (21.1)  | 145 (35.4) | 5.74(1.29, 25.62)   | 5.07(1.12, 22.92)  |
| 60-79                    | 52 (65.0)         | 128 (31.9) | 14.9(4.53, 49.03)  | 9.78(2.85, 33.63)  | 44 (62.0)  | 136 (33.2) | 17.96(4.26, 75.7)   | 14.59(3.35, 63.63) |
| ≥80                      | 13 (16.2)         | 15 (3.7)   | 31.78(8.1, 124.61) | 18.85(4.37, 81.24) | 10 (14.1)  | 18 (4.4)   | 30.83(6.24, 152.36) | 17.51(3.23, 94.86) |
| <b>Medical histories</b> |                   |            |                    |                    |            |            |                     |                    |
| COPD                     | 4 (5.0)           | 5 (1.2)    | 3.51(2, 6.16)      | 1.94(1.01, 3.71)   | 2 (2.8)    | 7 (1.7)    | 3.02(1.68, 5.45)    | 1.94(1, 3.75)      |
| Heart disease            | 16 (20.0)         | 36 (9.0)   | 9.99(5.87, 17.02)  | 7.43(3.99, 13.83)  | 17 (23.9)  | 35 (8.5)   | 14.87(8.29, 26.7)   | 13.16(6.75, 25.68) |
| Diabetes                 | 25 (31.2)         | 46 (11.5)  | 2.53(1.33, 4.84)   | 0.9(0.42, 1.9)     | 21 (29.6)  | 50 (12.2)  | 3.37(1.77, 6.43)    | 1.68(0.82, 3.43)   |
| Hypertension             | 37 (46.2)         | 83 (20.7)  | 4.17(1.09, 15.88)  | 0.99(0.22, 4.54)   | 27 (38.0)  | 93 (22.7)  | 1.67(0.34, 8.2)     | 0.55(0.1, 3.11)    |
| Cerebrovascular disease  | 9 (11.2)          | 7 (1.7)    | 3.3(2, 5.44)       | 1.26(0.69, 2.31)   | 8 (11.3)   | 8 (2.0)    | 2.09(1.23, 3.56)    | 0.72(0.38, 1.37)   |
| Chronic kidney disease   | 7 (8.8)           | 10 (2.5)   | 7.13(2.57, 19.78)  | 2.06(0.65, 6.57)   | 5 (7.0)    | 12 (2.9)   | 6.38(2.31, 17.61)   | 2.78(0.87, 8.89)   |
| Chronic liver disease    | 4 (5.0)           | 7 (1.7)    | 3.75(1.38, 10.17)  | 1.78(0.52, 6.06)   | 3 (4.2)    | 8 (2.0)    | 2.51(0.86, 7.36)    | 1.1(0.31, 3.88)    |
| Others                   | 15 (18.8)         | 48 (12.0)  | 2.96(0.85, 10.37)  | 4.73(1.07, 20.85)  | 6 (8.5)    | 57 (13.9)  | 2.22(0.57, 8.57)    | 2.54(0.6, 10.76)   |

|                                     |           |             |                    |                  |             |             |                   |                  |
|-------------------------------------|-----------|-------------|--------------------|------------------|-------------|-------------|-------------------|------------------|
| <b>Number of Comorbidities</b>      | 2 (1.42)  | 0.75 (1.04) |                    |                  | 1.85 (1.29) | 0.80 (1.12) |                   |                  |
| <b>(mean, SD)</b>                   |           |             |                    |                  |             |             |                   |                  |
| <b>Lab tests</b>                    |           |             |                    |                  |             |             |                   |                  |
| Aspartate aminotransferase (>40U/L) | 42 (52.5) | 121 (30.8)  | 1.7(0.9, 3.21)     | 1.33(0.61, 2.87) | 37 (52.1)   | 126 (30.7)  | 0.57(0.24, 1.38)  | 0.3(0.11, 0.84)  |
| Glutamyltranspeptidase (>50U/L)     | 21 (26.6) | 96 (24.4)   | 2.13(1.74, 2.6)    | 2.14(1.37, 3.32) | 17 (23.9)   | 100 (24.4)  | 1.82(1.5, 2.21)   | 1.85(1.19, 2.85) |
| Albumin (<40g/L)                    | 66 (82.5) | 103 (25.9)  | 2.48(1.52, 4.05)   | 1.5(0.85, 2.63)  | 50 (70.4)   | 119 (29.0)  | 2.45(1.47, 4.09)  | 1.48(0.84, 2.6)  |
| Urea nitrogen (>8.1mmol/L)          | 41 (51.2) | 43 (10.8)   | 1.12(0.65, 1.95)   | 0.97(0.52, 1.83) | 27 (38.0)   | 57 (13.9)   | 0.98(0.54, 1.76)  | 0.84(0.44, 1.61) |
| Serum creatinine (>111µmol/L)       | 45 (56.2) | 65 (16.3)   | 13.46(7.25, 24.98) | 8.96(4.4, 18.23) | 35 (49.3)   | 75 (18.3)   | 5.82(3.35, 10.12) | 3.71(2.01, 6.85) |
| Serum sodium (<136mmol/L)           | 33 (41.2) | 139 (35.1)  | 8.7(5.07, 14.95)   | 4.68(2.46, 8.91) | 36 (50.7)   | 136 (33.2)  | 3.8(2.18, 6.62)   | 2.06(1.06, 4)    |
| <b>Treatments</b>                   |           |             |                    |                  |             |             |                   |                  |
| Oxygen therapy                      | 51 (63.7) | 254 (63.3)  | 6.61(3.95, 11.06)  | 4.55(2.44, 8.51) | 43 (60.6)   | 262 (63.9)  | 4.34(2.56, 7.37)  | 3.11(1.65, 5.83) |
| Glucocorticoid therapy              | 61 (76.2) | 165 (41.5)  | 1.3(0.79, 2.12)    | 0.83(0.47, 1.46) | 50 (70.4)   | 176 (42.9)  | 2.07(1.25, 3.45)  | 1.43(0.82, 2.5)  |
| Immunoglobulin therapy              | 39 (48.8) | 109 (27.4)  | 1.02(0.62, 1.68)   | 0.75(0.42, 1.32) | 26 (36.6)   | 122 (29.8)  | 0.87(0.52, 1.45)  | 0.63(0.36, 1.12) |
| Antibiotic therapy                  | 70 (87.5) | 350 (87.9)  | 4.53(2.61, 7.88)   | 3.07(1.58, 5.95) | 63 (88.7)   | 357 (87.1)  | 3.17(1.83, 5.46)  | 2.03(1.1, 3.76)  |
| Antiviral therapy                   | 73 (91.2) | 376 (94.5)  | 2.52(1.54, 4.12)   | 2.18(1.2, 3.93)  | 66 (93.0)   | 383 (93.4)  | 1.36(0.81, 2.31)  | 0.94(0.52, 1.72) |
| <b>Outcomes</b>                     |           |             |                    |                  |             |             |                   |                  |
| Death                               | 74 (92.5) | 73 (18.2)   |                    |                  | 67 (94.4)   | 80 (19.5)   |                   |                  |
| Discharge                           | 6 (7.5)   | 312 (77.8)  | 0.96(0.46, 1.99)   | 0.66(0.28, 1.57) | 4 (5.6)     | 314 (76.6)  | 1.17(0.53, 2.58)  | 0.93(0.38, 2.28) |

---

|                   |         |          |                  |                 |         |          |                 |                  |
|-------------------|---------|----------|------------------|-----------------|---------|----------|-----------------|------------------|
| Still in hospital | 0 (0.0) | 16 (4.0) | 0.61(0.25, 1.48) | 0.73(0.24, 2.2) | 0 (0.0) | 16 (3.9) | 0.93(0.35, 2.5) | 1.19(0.38, 3.71) |
|-------------------|---------|----------|------------------|-----------------|---------|----------|-----------------|------------------|

---

382

WITHDRAWN  
see manuscript DOI for details
